# Supplementary material
Source: HighWire-hosted journal article supplement (https://qualitysafety.bmj.com/highwire/filestream/162860/field_highwire_adjunct_files/2/bmjqs-2022-015498supp003_data_supplement.pdf)

## Supplementary file 3

PRISMA diagram

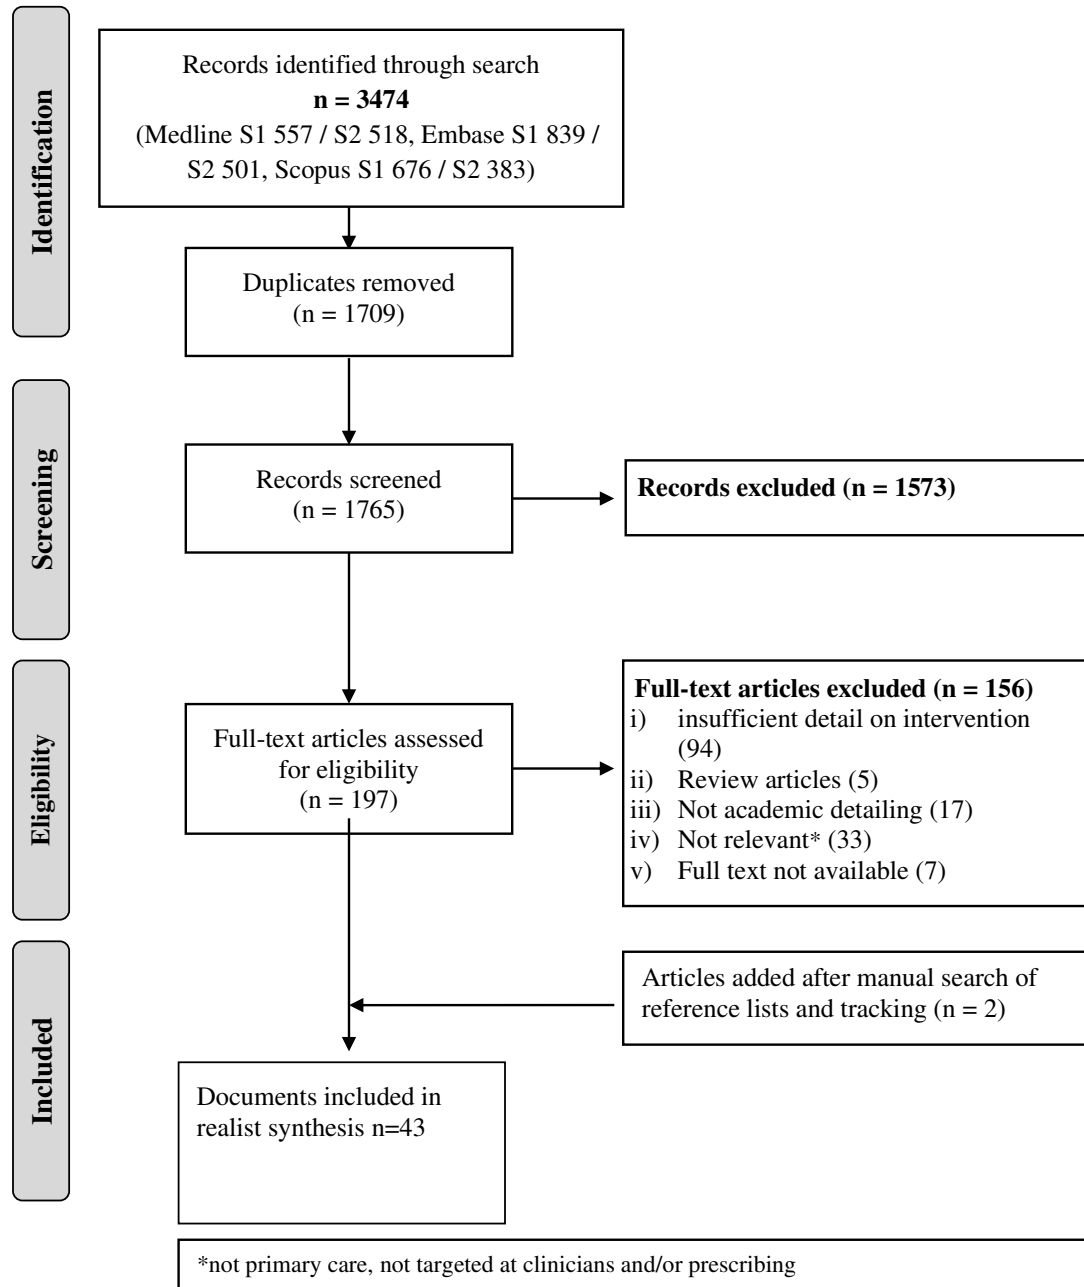

Supplement: bmjqs-2022-015498supp003_data_supplement.pdf [file bmjqs-2022-015498supp003_data_supplement.pdf]
